# Supplementary material for: Characterizing the Effects of Voluntary Wheel Running on Cardiac SERCA Function in Ovariectomized Mice
Source: MDPI journal article supplement (doi:10.3390/muscles1030016), 2022-12-10
Supplement: s1 [file s1]

Archive with 1 entries (1 files):
- muscles-2038899-supplementary.pdf
