# Supplementary material for: Characterizing the Effects of Voluntary Wheel Running on Cardiac SERCA Function in Ovariectomized Mice
Source: MDPI journal article supplement (doi:10.3390/muscles1030016), 2022-12-10
Supplement: s1 [file s1 › muscles-2038899-supplementary.pdf]

*Communication*

# Characterizing the effects of voluntary wheel running on cardiac SERCA function in ovariectomized mice

Bianca M. Marcella<sup>1,2</sup>, Mia S. Geromella<sup>1,2</sup>, Ahmad Mohammad<sup>3</sup>, Jake Sweezey-Munroe<sup>3</sup>, Rebecca E.K. MacPherson<sup>3</sup>, Val A. Fajardo<sup>1,2,\*</sup>

<sup>1</sup> Department of Kinesiology, Brock University, St. Catharines, ON, Canada

<sup>2</sup> Centre for Bone and Muscle Health, Brock University, St. Catharines, ON, Canada

<sup>3</sup> Department of Health Sciences, Brock University, St. Catharines, ON, Canada

\* Correspondence: vfajardo@brocku.ca

## Supplemental Figures

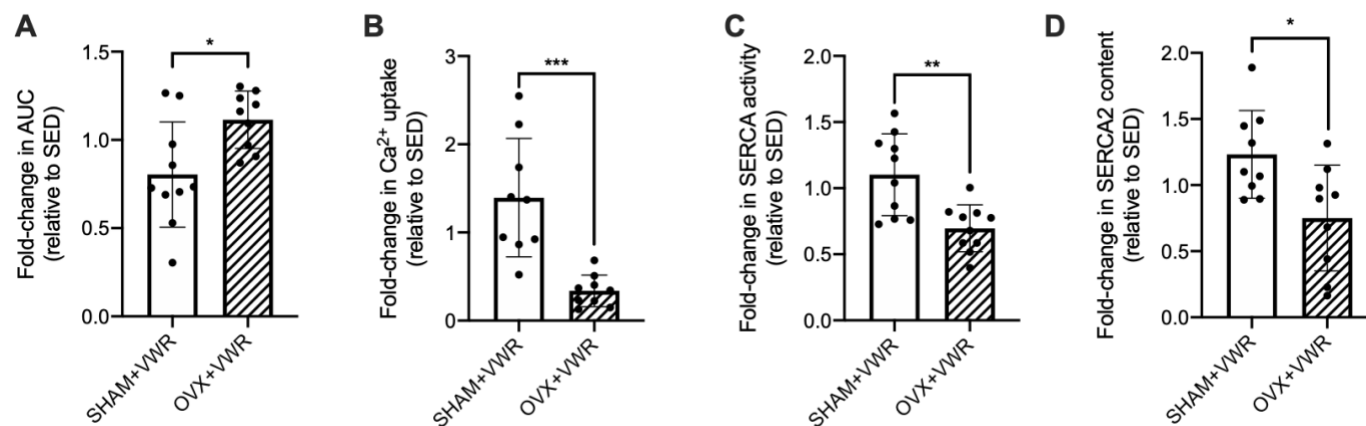

Figure S1. Fold-change analysis for SR-Ca<sup>2+</sup> uptake, SERCA activity, and SERCA2a content. **(A)** Fold-change in AUC. **(B)** Fold-change in Ca<sup>2+</sup> uptake. **(C)** Fold-change in SERCA activity. **(D)** Fold-change in SERCA2a content. For **(A) – (D)** an unpaired t-test was used. For **(A) – (D)** a significant difference between SHAM+VWR mice and OVX+VWR mice was found. \*, \*\*, \*\*\* -  $p < 0.05$ ,  $p < 0.01$ ,  $p < 0.001$ ;  $n = 10$  per group.
